# Supplementary material for: Activation of the Endoplasmic Reticulum Stress Response Impacts the NOD1 Signaling Pathway
Source: PubMed Central journal article supplement (PMC6652781; doi:10.1128/iai.00826-18), 2019-07-23
Supplement: IAI.00826-18-s0001.pdf [file IAI.00826-18-s0001.pdf]

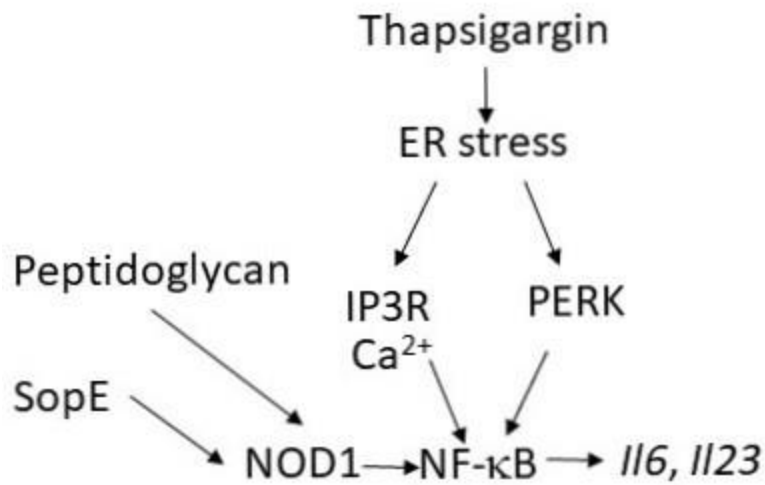

**Figure S1. Thapsigargin-induced ER stress synergizes with NOD1 activation.** Activation of NOD1 by SopE or peptidoglycan results in NF- $\kappa$ B activation and expression of *IL6* and *IL23*. The NOD1-mediated inflammatory response is synergistically increased via activation of PERK and IP3R induced by the ER stress inducer thapsigargin.
