# Supplementary material for: Activation of the Endoplasmic Reticulum Stress Response Impacts the NOD1 Signaling Pathway
Source: PubMed Central journal article supplement (PMC6652781; doi:10.1128/iai.00826-18), 2019-07-23
Supplement: IAI.00826-18-s0003.pdf [file IAI.00826-18-s0003.pdf]

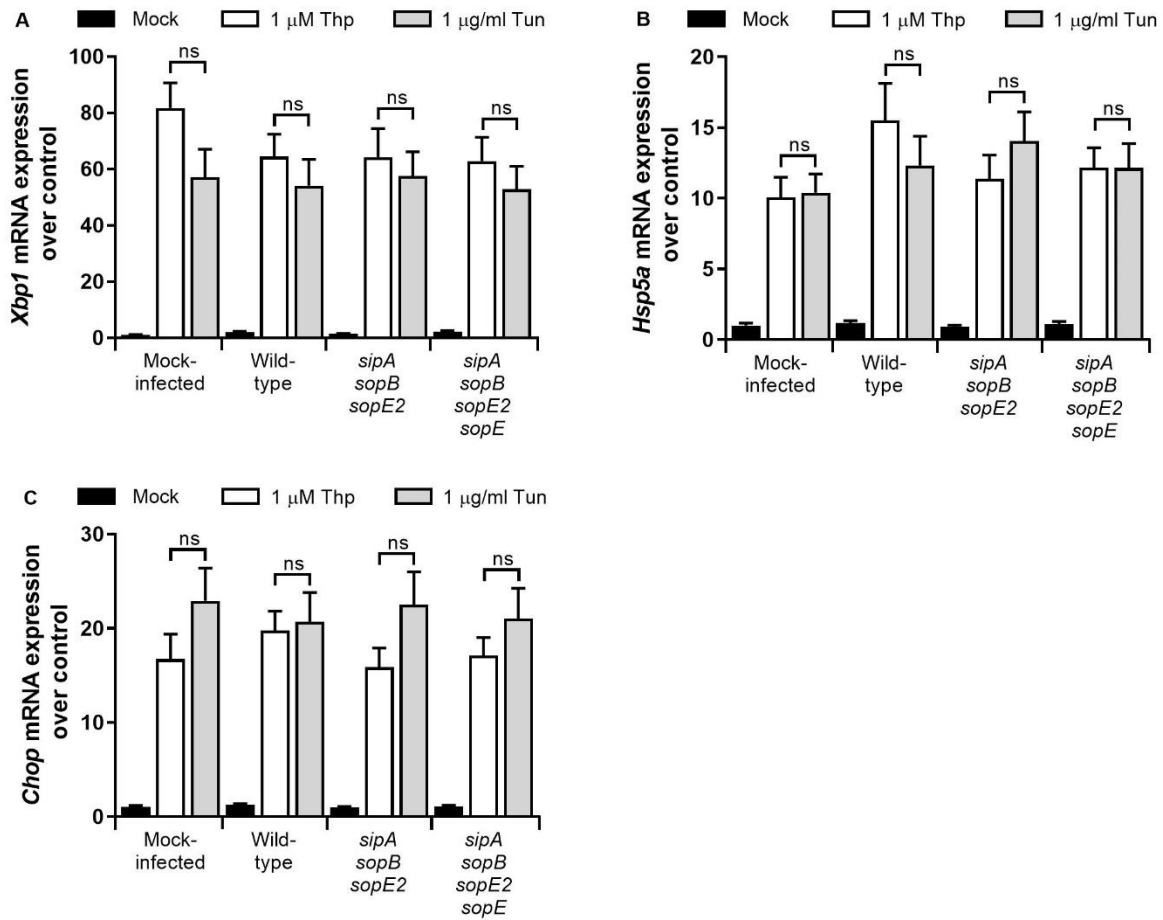

**Figure S3. Thapsigargin and tunicamycin induced expression levels of UPR target genes in MODE-K cells.** MODE-K cells were pretreated with thapsigargin (1  $\mu$ M) or tunicamycin (1  $\mu$ g/ml) and infected with the *S. Typhimurium* wild type strain SL1344, the SopE-positive *sipAsopBsopE2* mutant strain and the *sipAsopBsopE2sopE2* mutant strain. RNA was extracted and RT-PCR performed to determine the expression of (A) *Xbp1*, (B) *Hsp5a* and (C) *Chop*. Data represents means  $\pm$  standard errors of three independent experiments in duplicate. A two-tailed paired Student *t* test was used to determine statistical significance. A *P* value of  $<0.05$  was taken to be significant.
